# Supplementary material
Source: publisher figshare collection journal article supplement (https://acs.figshare.com/ndownloader/files/21524673)
Supplement: Supplementary file 1 [file 21524673]

Archive with 3 entries (3 files):
- info.xml
- jz9b03070_high_quality.mp4
- jz9b03070.pdf
