# Supplementary material
Source: publisher figshare collection journal article supplement (https://acs.figshare.com/ndownloader/files/21524673)
Supplement: Supplementary file 1 [file 21524673 › info.xml]

<presentation>
	<article>
		<title>Pulse Shaped Dynamic Nuclear Polarization under Magic-Angle Spinning</title>
		<doi>10.1021/acs.jpclett.9b03070</doi>
		<copyright>American Chemical Society</copyright>
		<narrator>Songi Han, Asif Equbal, Kan Tagami</narrator>
		<contact>Kan Tagami</contact>
		<contact-email>katagami@ucsb.edu</contact-email>
		<author-list>
			<author>Songi Han</author>
		</author-list>
	</article>
	<slides height-width-ratio=".75">
		<slide audio-time="32">
			<subtitle/>
		</slide>
		<slide audio-time="83">
			<subtitle/>
		</slide>
		<slide audio-time="53">
			<subtitle/>
		</slide>
		<slide audio-time="60">
			<subtitle/>
		</slide>
		<slide audio-time="55">
			<subtitle/>
		</slide>
		<slide audio-time="76">
			<subtitle/>
		</slide>
		<slide audio-time="50">
			<subtitle/>
		</slide>
		<slide audio-time="33">
			<subtitle/>
		</slide>
	</slides>
	<audio duration="442"/>
</presentation>
